# Supplementary material
Source: HighWire-hosted journal article supplement (https://erj.ersjournals.com/content/59/4/2100620)
Supplement: inline-supplementary-material-1 [file inline-supplementary-material-1.pdf]

## **Supplementary**

### **Prediction of ventilator-associated pneumonia outcomes according to the early microbiological response: a retrospective observational study.**

Adrian Ceccato<sup>\*1, 2</sup>, Cristina Dominedò<sup>\*3,4</sup>, Miquel Ferrer<sup>1,5</sup>, Ignacio Martin-Loeches<sup>1, 6</sup>, Enric Barbeta<sup>1,2,5</sup>, Albert Gabarrús<sup>1,5</sup>, Catia Cillóniz<sup>1,5</sup>, Otavio T. Ranzani<sup>7</sup>, Gennaro De Pascale<sup>3,4</sup>, Stefano Nogas<sup>8</sup>, Pierluigi Di Giannatale<sup>9</sup>, Massimo Antonelli<sup>3,4</sup>, Antoni Torres<sup>1,5</sup>

## **METHODS**

### **Procedures and definitions**

VAP was clinically suspected in ICU patients if they had been mechanically ventilated for at least 48 hours and developed new or progressive radiological pulmonary infiltrates together with either or both of the following:

- at least two signs from among a temperature  $>38^{\circ}\text{C}$  or  $<36^{\circ}\text{C}$ , leukocytosis  $>12,000/\text{mm}^3$  or leukopenia  $<4,000/\text{mm}^3$ , and purulent respiratory secretions [1, 2];
- A Simplified Clinical Pulmonary Infectious Score (sCPIS) of  $>6$  points [3, 4].

Early-onset VAP was defined if these occurred within the first 4 days of mechanical ventilation [1].

Initial empiric antimicrobial treatment was administered at the discretion of the attending physician, based on local adaptation of current guidelines, the most frequently isolated pathogens, and patterns of antimicrobial sensitivity. When cultures

results became available, appropriate modifications were made to antibiotic therapy based on pathogen identification and sensitivity testing.

### **Data collection, evaluation, and microbiological diagnosis**

Demographic data included age, gender, weight, height, body surface area, reason for ICU admission, alcohol and smoking use, and comorbidities. We also recorded any empirical antimicrobial treatments and subsequent changes.

### **Statistical analysis**

We report numbers and percentages for categorical variables, and the median and first and third quartiles for continuous variables (not normally distributed data). Categorical variables were compared using the chi-square test. Two continuous variables were compared using the Mann-whitney test. Three continuous variables were compared using the Kruskal-Wallis test, and if significant overall, post-hoc pairwise comparisons were conducted via the Bonferroni test to control for the experiment-wise error rate.

Logistic regression analyses [5] were used to examine the association between superinfection and risk factors. Each risk factor was first tested individually (age, sex, smoking habit, alcohol abuse, previous corticosteroids use, previous antibiotic use,  $\geq 5$  days of previous hospitalization, previous respiratory isolation, diabetes mellitus, chronic renal failure, solid cancer, chronic heart diseases, chronic lung diseases, chronic liver diseases, APACHE II score at ICU admission, SAPS II score at ICU admission, SOFA score at ICU admission, causes of ICU admission, days of MV before VAP, Late onset VAP, CPIS at VAP diagnosis, SOFA score at VAP diagnosis, temperature at VAP diagnosis, multilobar at VAP diagnosis, ARDS at VAP diagnosis, pleural effusion at VAP diagnosis, shock at VAP diagnosis, fever at VAP diagnosis, creatinine at VAP

diagnosis, hemoglobin at VAP diagnosis, white blood cell count at VAP diagnosis, lymphocytes at VAP diagnosis, C-reactive protein at VAP diagnosis, *Pseudomonas aeruginosa*, *Staphylococcus aureus*, *Klebsiella spp.*, *Enterobacter spp.*, *Proteus spp.*, *Serratia spp.*, *Aspergillus spp.*, *Streptococcus pneumoniae*, *Escherichia coli*, *Stenotrophomonas maltophilia*, virus, and initial appropriate treatment), before all risk factors that showed associations in the univariate model ( $p < 0.10$ ) were added to the multivariable model. Finally, a backward stepwise selection (likelihood ratio) ( $p_{in} < 0.05$ ,  $p_{out} > 0.10$ ) was used to determine factors associated with superinfection [6]. We then calculated the odds ratios (ORs) and their 95% confidence intervals (CIs). Multicollinearity was confirmed by calculating the variance inflation factor. The Hosmer–Lemeshow goodness-of-fit test was performed to assess the overall fit of the final model. The area under the receiver operating characteristic curve (AUC) of the multivariable model was calculated.

Cox proportional hazards regression analyses [7] were performed to determine the effect of superinfection on 28-day mortality, both crude and adjusted for potential confounders (i.e., APACHE II score at ICU admission, change in SOFA score from VAP diagnosis to day 3, C-reactive protein at VAP diagnosis, and initial appropriate treatment). We calculated the hazard ratios and their 95% CIs. Proportional hazards assumptions were tested with log-minus-log plots. Any lack of fit of our final model was evaluated by deviance residuals.

To measure possible overfitting and instability of selection variables in the final models, we performed internal validation using ordinary non-parametric bootstrapping with 1,000 bootstrap samples and bias-corrected, accelerated 95% CIs

[8].

A two-sided p value  $<0.05$  was considered statistically significant. All analyses were performed with IBM SPSS Statistics 26.0 (IBM Corp., Armonk, NY, USA).

## RESULTS

| eTable 1. Demographic and baseline characteristics of patients at ICU admission |                         |                            |                         |                                               |              |
|---------------------------------------------------------------------------------|-------------------------|----------------------------|-------------------------|-----------------------------------------------|--------------|
|                                                                                 | Group 1                 | Group 2                    | Group 3                 | Group 4                                       |              |
| Variable                                                                        | Persistence<br>(n = 67) | Superinfection<br>(n = 25) | Eradication<br>(n = 65) | Non-<br>microbiologic<br>assessed<br>(n = 93) | p value      |
| Age (years), median (Q1; Q3)                                                    | 65 (53; 72)             | 56 (48; 74)                | 61 (45; 74)             | 63 (55; 74)                                   | 0.416        |
| Male sex, n (%)                                                                 | 50 (75)                 | 15 (60)                    | 46 (71)                 | 63 (68)                                       | 0.555        |
| Current or former smoking habit,<br>n (%)                                       | 30 (46)                 | 13 (52)                    | 40 (62)                 | 46 (49)                                       | 0.291        |
| Current or former alcohol abuse,<br>n (%)                                       | 18 (27)                 | 5 (20)                     | 17 (26)                 | 17 (18)                                       | 0.503        |
| Previous corticosteroids use, n<br>(%)                                          | 3 (5)                   | 4 (17)                     | 5 (8)                   | 9 (11)                                        | 0.385        |
| Previous antibiotic use, n (%)                                                  | 52 (78)                 | 18 (72)                    | 55 (85)                 | 76 (82)                                       | 0.515        |
| ≥ 5 days of previous<br>hospitalization, n (%)                                  | 44 (66)                 | 13 (52)                    | 47 (72)                 | 64 (69)                                       | 0.312        |
| Previous respiratory isolation, n<br>(%)                                        | 28 (42)                 | 8 (32)                     | 34 (52)                 | 32 (34)                                       | 0.113        |
| Comorbidities, n (%)                                                            |                         |                            |                         |                                               |              |
| Diabetes mellitus                                                               | 16 (24)                 | 1 (4)                      | 14 (22)                 | 23 (25)                                       | 0.150        |
| Chronic renal failure                                                           | 6 (9)                   | 0 (0)                      | 3 (5)                   | 12 (13)                                       | 0.113        |
| Solid cancer                                                                    | 13 (19)                 | 3 (12)                     | 4 (6)                   | 9 (10)                                        | 0.102        |
| Chronic heart diseases                                                          | 21 (31)                 | 6 (24)                     | 16 (25)                 | 36 (39)                                       | 0.230        |
| Chronic lung diseases                                                           | 19 (28)                 | 7 (28)                     | 26 (40)                 | 23 (25)                                       | 0.216        |
| COPD                                                                            | 13 (19)                 | 6 (24)                     | 17 (26)                 | 14 (15)                                       | 0.358        |
| Chronic liver diseases                                                          | 9 (13)                  | 2 (8)                      | 9 (14)                  | 18 (20)                                       | 0.474        |
| APACHE II score, median (Q1;<br>Q3)                                             | 16 (12; 21)             | 17 (13; 19)                | 16 (12; 21)             | 17 (14; 24)                                   | 0.307        |
| SAPS II score, median (Q1; Q3)                                                  | 43 (36; 52)             | 40 (34; 51)                | 38 (28; 46)             | 40 (31; 51)                                   | 0.413        |
| SOFA score, median (Q1; Q3)                                                     | 7 (5; 10)               | 7 (5; 9)                   | 7 (6; 10)               | 8 (6; 10)                                     | 0.279        |
| Causes of ICU admission, n (%)                                                  |                         |                            |                         |                                               |              |
| Hypercapnic respiratory<br>failure                                              | 3 (5)                   | 4 (16)                     | 8 (13)                  | 10 (11)                                       | 0.282        |
| Hypoxemic respiratory failure                                                   | 6 (9)                   | 2 (8)                      | 3 (5)                   | 9 (10)                                        | 0.706        |
| Acute coronary syndrome                                                         | 1 (2)                   | 0 (0)                      | 5 (8)                   | 4 (5)                                         | 0.200        |
| Polytrauma                                                                      | 9 (13)                  | 0 (0)                      | 11 (18)                 | 5 (5)                                         | <b>0.024</b> |
| Postoperative                                                                   | 13 (19)                 | 4 (16)                     | 12 (19)                 | 21 (23)                                       | 0.846        |
| Cardiac arrest                                                                  | 3 (5)                   | 5 (20)                     | 4 (6)                   | 8 (9)                                         | 0.101        |
| Decreased consciousness                                                         | 14 (21)                 | 4 (16)                     | 14 (22)                 | 15 (16)                                       | 0.778        |

| <b>eTable 1. Demographic and baseline characteristics of patients at ICU admission</b> |                                 |                                    |                                 |                                                         |                |
|----------------------------------------------------------------------------------------|---------------------------------|------------------------------------|---------------------------------|---------------------------------------------------------|----------------|
|                                                                                        | <b>Group 1</b>                  | <b>Group 2</b>                     | <b>Group 3</b>                  | <b>Group 4</b>                                          |                |
| <b>Variable</b>                                                                        | <b>Persistence<br/>(n = 67)</b> | <b>Superinfection<br/>(n = 25)</b> | <b>Eradication<br/>(n = 65)</b> | <b>Non-<br/>microbiologic<br/>assessed<br/>(n = 93)</b> | <b>p value</b> |
| Shock                                                                                  | 8 (12)                          | 3 (12)                             | 3 (5)                           | 11 (12)                                                 | 0.439          |
| Nonsurgical abdominal<br>disease                                                       | 2 (3)                           | 2 (8)                              | 0 (0)                           | 5 (6)                                                   | 0.196          |
| Others                                                                                 | 8 (12)                          | 1 (4)                              | 3 (5)                           | 3 (4)                                                   | 0.131          |

Abbreviations: APACHE II score = Acute Physiology And Chronic Health Evaluation II score; COPD = chronic obstructive pulmonary disease; ICU = intensive care unit; Q1 = first quartile; Q3 = third quartile; SAPSII = simplified acute physiology score II; SOFA = sequential organ failure assessment.

<sup>a</sup> p <0.05 for comparison between the persistence group and the superinfection group.

<sup>b</sup> p <0.05 for comparison between the persistence group and the eradication group.

<sup>c</sup> p <0.05 for comparison between the persistence group and the non-microbiologic assessed group.

<sup>d</sup> p <0.05 for comparison between the superinfection group and the eradication group.

<sup>e</sup> p <0.05 for comparison between the superinfection group and the non-microbiologic assessed group.

<sup>f</sup> p <0.05 for comparison between the eradication group and the non-microbiologic assessed group.

| eTable 2. Patients characteristics at VAP diagnosis |                         |                            |                         |                                               |                          |
|-----------------------------------------------------|-------------------------|----------------------------|-------------------------|-----------------------------------------------|--------------------------|
|                                                     | Group 1                 | Group 2                    | Group 3                 | Group 4                                       |                          |
| Variable                                            | Persistence<br>(n = 67) | Superinfection<br>(n = 25) | Eradication<br>(n = 65) | Non-<br>microbiologic<br>assessed<br>(n = 93) | p<br>value               |
| Days of MV before VAP, median (Q1; Q3)              | 5 (3; 10)               | 5 (3; 9)                   | 6 (4; 13)               | 5 (3; 8)                                      | 0.181                    |
| Late onset VAP, n (%)                               | 51 (77)                 | 18 (72)                    | 54 (83)                 | 60 (68)                                       | 0.191                    |
| Severity assessment of pneumonia                    |                         |                            |                         |                                               |                          |
| CPIS, median (Q1; Q3)                               | 6 (5; 7)                | 6 (6; 7)                   | 6 (6; 8)                | 7 (6; 7)                                      | 0.365                    |
| SOFA score, median (Q1; Q3)                         | 7 (5; 10)               | 9 (7; 11)                  | 7 (5; 9)                | 8 (5; 11)                                     | 0.184                    |
| Temperature (°C), median (Q1; Q3)                   | 37.7 (36.2; 38.0)       | 36.0 (35.4; 37.6)          | 37.6 (36.2; 38.2)       | 37.0 (35.4; 38.0)                             | <b>0.033</b>             |
| Temperature < 36°C, n (%)                           | 15 (23)                 | 12 (48)                    | 13 (20)                 | 31 (34)                                       | <b>0.023<sup>d</sup></b> |
| Multilobar pneumonia, n (%)                         | 24 (36)                 | 11 (44)                    | 24 (37)                 | 46 (49)                                       | 0.272                    |
| Presence of ARDS, n (%)                             | 5 (8)                   | 4 (16)                     | 9 (14)                  | 18 (20)                                       | 0.211                    |
| Pleural effusion, n (%)                             | 17 (26)                 | 6 (27)                     | 17 (27)                 | 31 (34)                                       | 0.690                    |
| Shock at pneumonia diagnosis, n (%)                 | 28 (42)                 | 18 (72)                    | 27 (42)                 | 45 (49)                                       | 0.053                    |
| Laboratory variables, median (Q1; Q3)               |                         |                            |                         |                                               |                          |
| Creatinine (mg/dL)                                  | 0.9 (0.7; 1.2)          | 0.7 (0.6; 1.7)             | 1.0 (0.7; 1.5)          | 1.0 (0.7; 1.9)                                | 0.329                    |
| Hemoglobin (g/dL)                                   | 10.1 (9.5; 11.2)        | 10.6 (9.7; 12.0)           | 10.5 (9.2; 11.7)        | 9.8 (9.0; 11.5)                               | 0.301                    |
| White blood cell count (10 <sup>9</sup> cells/L)    | 10.7 (8.5; 16.3)        | 12.6 (8.9; 16.0)           | 12.0 (9.2; 17.2)        | 13.2 (9.4; 17.8)                              | 0.461                    |
| Lymphocytes (n/mm <sup>3</sup> )                    | 827 (609; 1177)         | 743 (410; 1061)            | 963 (718; 1306)         | 851 (586; 1376)                               | 0.497                    |
| C-reactive protein (mg/L)                           | 11.8 (6.6; 19.5)        | 14.1 (4.9; 20.0)           | 13.2 (5.2; 23.7)        | 11.9 (6.4; 19.3)                              | 0.966                    |
| Procalcitonin (ng/mL)                               | 0.3 (0.1; 0.7)          | 0.5 (0.1; 4.7)             | 0.3 (0.1; 0.9)          | 0.4 (0.1; 1.5)                                | 0.479                    |
| PaO <sub>2</sub> /FiO <sub>2</sub> (mmHg)           | 233 (178; 283)          | 176 (147; 265)             | 176 (140; 236)          | 200 (152; 256)                                | <b>0.017<sup>b</sup></b> |

Abbreviations: ARDS = acute respiratory distress syndrome; CPIS = clinical pulmonary infection score; Q1 = first quartile; Q3 = third quartile; MV = mechanical ventilation; PaO<sub>2</sub>/FiO<sub>2</sub> = ratio of arterial oxygen tension to inspired oxygen fraction; SOFA = sequential organ failure assessment; VAP = ventilator-associated pneumonia.

<sup>a</sup> p <0.05 for comparison between the persistence group and the superinfection group.

<sup>b</sup> p <0.05 for comparison between the persistence group and the eradication group.

<sup>c</sup> p <0.05 for comparison between the persistence group and the non-microbiologic assessed group.

<sup>d</sup> p <0.05 for comparison between the superinfection group and the eradication group.

<sup>e</sup> p <0.05 for comparison between the superinfection group and the non-microbiologic assessed group.

<sup>f</sup> p < 0.05 for comparison between the eradication group and the non-microbiologic assessed group.



| <b>eTable 3. Patients characteristics 3 days after VAP diagnosis</b> |                                 |                                    |                                 |                                                         |                            |
|----------------------------------------------------------------------|---------------------------------|------------------------------------|---------------------------------|---------------------------------------------------------|----------------------------|
|                                                                      | <b>Group 1</b>                  | <b>Group 2</b>                     | <b>Group 3</b>                  | <b>Group 4</b>                                          |                            |
| <b>Variable</b>                                                      | <b>Persistence<br/>(n = 67)</b> | <b>Superinfection<br/>(n = 25)</b> | <b>Eradication<br/>(n = 65)</b> | <b>Non-<br/>microbiologic<br/>assessed<br/>(n = 93)</b> | <b>p value</b>             |
| Severity assessment, median<br>(Q1; Q3)                              |                                 |                                    |                                 |                                                         |                            |
| CPIS                                                                 | 6 (4; 7)                        | 6 (6; 7)                           | 6 (4; 7)                        | 6 (4; 7)                                                | 0.543                      |
| SOFA score                                                           | 6 (4; 9)                        | 8 (7; 10)                          | 7 (4; 9)                        | 7 (4; 10)                                               | 0.079                      |
| SOFA changes from day 1 at<br>day 3                                  | 0 (-2; 0)                       | 0 (-1; 1)                          | 0 (-1; 0)                       | 0 (-2; 1)                                               | 0.833                      |
| Temperature (°C)                                                     | 37.1 (36.0;<br>38.0)            | 35.7 (35.2;<br>37.1)               | 37.2 (36.3;<br>37.8)            | 37.0 (36.0;<br>37.5)                                    | <b>0.003<sup>ad</sup></b>  |
| Temperature < 36°C, n (%)                                            | 14 (22)                         | 14 (56)                            | 11 (17)                         | 20 (23)                                                 | <b>0.001<sup>adf</sup></b> |
| Laboratory variables, median<br>(Q1; Q3)                             |                                 |                                    |                                 |                                                         |                            |
| C-reactive protein (mg/L)                                            | 10.4 (5.3; 16.9)                | 12.8 (5.4; 26.1)                   | 10.9 (2.8; 19.0)                | 11.3 (5.4;<br>19.8)                                     | 0.740                      |
| Procalcitonin (ng/mL)                                                | 0.2 (0.1; 0.6)                  | 0.5 (0.1; 2.8)                     | 0.1 (0.1; 0.6)                  | 0.6 (0.1; 1.2)                                          | 0.096                      |
| PaO <sub>2</sub> /FiO <sub>2</sub> (mmHg)                            | 255 (176; 306)                  | 225 (188; 272)                     | 221 (151; 285)                  | 222 (156;<br>266)                                       | 0.223                      |

Abbreviations: CPIS = clinical pulmonary infection score; Q1 = first quartile; Q3 = third quartile; SOFA = sequential organ failure assessment; PaO<sub>2</sub>/FiO<sub>2</sub> = ratio of arterial oxygen tension to inspired oxygen fraction; VAP = ventilator-associated pneumonia.

<sup>a</sup> p < 0.05 for comparison between the persistence group and the superinfection group.

<sup>b</sup> p < 0.05 for comparison between the persistence group and the eradication group.

<sup>c</sup> p < 0.05 for comparison between the persistence group and the non-microbiologic assessed group.

<sup>d</sup> p < 0.05 for comparison between the superinfection group and the eradication group.

<sup>e</sup> p < 0.05 for comparison between the superinfection group and the non-microbiologic assessed group.

<sup>f</sup> p < 0.05 for comparison between the eradication group and the non-microbiologic assessed group.

| <b>eTable 4. Outcomes</b>                               |                                 |                                    |                                 |                                                         |                                |
|---------------------------------------------------------|---------------------------------|------------------------------------|---------------------------------|---------------------------------------------------------|--------------------------------|
|                                                         | <b>Group 1</b>                  | <b>Group 2</b>                     | <b>Group 3</b>                  | <b>Group 4</b>                                          |                                |
| <b>Variable</b>                                         | <b>Persistence<br/>(n = 67)</b> | <b>Superinfection<br/>(n = 25)</b> | <b>Eradication<br/>(n = 65)</b> | <b>Non-<br/>microbiologic<br/>assessed<br/>(n = 93)</b> | <b>p value</b>                 |
| ERS/ESICM/ESCMID/ALAT<br>guidelines adherence, n<br>(%) | 44 (70)                         | 12 (50)                            | 40 (67)                         | 33 (61)                                                 | 0.339                          |
| Initial appropriate<br>treatment, n (%)                 | 54 (83)                         | 18 (75)                            | 54 (90)                         | 47 (87)                                                 | 0.326                          |
| Treatment failure on day 3,<br>n (%)                    | 44 (66)                         | 18 (72)                            | 37 (57)                         | 39 (42)                                                 | <b>0.006<sup>ce</sup></b>      |
| Days of MV, median (Q1;<br>Q3)                          | 14 (9; 24)                      | 22 (13; 43)                        | 18 (13; 27)                     | 10 (6; 16)                                              | <b>&lt;0.001<sup>cef</sup></b> |
| Ventilator-free-days,<br>median (Q1; Q3)                | 9 (0; 22)                       | 0 (0; 12)                          | 7 (0; 20)                       | 18 (0; 24)                                              | <b>0.001<sup>ae</sup></b>      |
| ICU length of stay, median<br>(Q1; Q3)                  | 20 (13; 32)                     | 24 (17; 44)                        | 24 (15; 35)                     | 15 (10; 23)                                             | <b>&lt;0.001<sup>cef</sup></b> |
| ICU mortality, n (%)                                    | 14 (21)                         | 13 (52)                            | 20 (31)                         | 28 (30)                                                 | <b>0.038<sup>a</sup></b>       |
| 28-days mortality, n (%)                                | 16 (24)                         | 11 (44)                            | 18 (28)                         | 19 (20)                                                 | 0.111                          |
| 90-days mortality, n (%)                                | 23 (34)                         | 16 (64)                            | 25 (40)                         | 33 (37)                                                 | 0.062                          |

Abbreviations: ERS = European Respiratory Society; Q1 = first quartile; Q3 = third quartile; ICU = intensive care unit; MV = mechanical ventilation.

<sup>a</sup> p <0.05 for comparison between the persistence group and the superinfection group.

<sup>b</sup> p <0.05 for comparison between the persistence group and the eradication group.

<sup>c</sup> p <0.05 for comparison between the persistence group and the non-microbiologic assessed group.

<sup>d</sup> p <0.05 for comparison between the superinfection group and the eradication group.

<sup>e</sup> p <0.05 for comparison between the superinfection group and the non-microbiologic assessed group.

<sup>f</sup> p <0.05 for comparison between the eradication group and the non-microbiologic assessed group.

**eTable 5. Significant univariate and multivariable regression analyses for superinfection (n = 147)**

| Variable                               | Univariate |               |         | Multivariable <sup>a</sup> |              |         |
|----------------------------------------|------------|---------------|---------|----------------------------|--------------|---------|
|                                        | OR         | 95% CI        | p value | OR                         | 95% CI       | p value |
| Diabetes mellitus                      | 0.14       | 0.02 to 1.09  | 0.061   | -                          | -            | -       |
| SOFA score at VAP diagnosis (+1 point) | 1.13       | 0.99 to 1.28  | 0.060   | -                          | -            | -       |
| Temperature at VAP diagnosis (+1°C)    | 0.65       | 0.46 to 0.91  | 0.011   | 0.67                       | 0.48 to 0.95 | 0.025   |
| Shock at VAP diagnosis                 | 3.55       | 1.39 to 9.09  | 0.008   | 3.43                       | 1.25 to 9.40 | 0.017   |
| <i>S. aureus</i>                       | 2.36       | 0.95 to 5.88  | 0.064   | 2.87                       | 1.06 to 7.75 | 0.038   |
| <i>Aspergillus</i>                     | 5.81       | 1.10 to 30.74 | 0.038   | -                          | -            | -       |

Abbreviations: CI = confidence interval; OR = Odds Ratio; SOFA = sequential organ failure assessment.

<sup>a</sup> Hosmer–Lemeshow goodness-of-fit test, p=0.52.

**eTable 6. Internal validation of the multivariable regression model for superinfection using non-parametric bootstrap technique**

| <b>Variable</b>                   | <b>Original</b> | <b>Bias</b> | <b>SE</b> | <b>95% BCa CI</b> | <b><i>p</i> value</b> |
|-----------------------------------|-----------------|-------------|-----------|-------------------|-----------------------|
| Temperature at VAP diagnosis (°C) | -0.397          | -0.012      | 0.190     | -0.774 to 0.700   | 0.021                 |
| Shock at VAP diagnosis            | 1.232           | 0.108       | 0.839     | 0.220 to 2.909    | 0.008                 |
| <i>S. aureus</i>                  | 1.054           | 0.016       | 0.571     | -0.087 to 2.250   | 0.041                 |

Abbreviations: BCa = adjusted bootstrap confidence interval; CI = confidence interval; SE = standard error; SOFA = sequential organ failure assessment.

**eTable 7. Causes of treatment failure**

|                                                                                                                                                  | <b>Group 1</b>                  | <b>Group 2</b>                     | <b>Group 3</b>                  |
|--------------------------------------------------------------------------------------------------------------------------------------------------|---------------------------------|------------------------------------|---------------------------------|
| <b>Variable n (%)</b>                                                                                                                            | <b>Persistence<br/>(n = 67)</b> | <b>Superinfection<br/>(n = 25)</b> | <b>Eradication<br/>(n = 65)</b> |
| No treatment failure                                                                                                                             | 23 (34)                         | 7 (28)                             | 28 (43)                         |
| No improvement of Pao2/Fio2                                                                                                                      | 12 (18)                         | 6(24)                              | 8 (13)                          |
| Persistence of fever or hypothermia with purulent respiratory secretions                                                                         | 11 (17)                         | 6 (24)                             | 7 (11)                          |
| Greater than or equal to 50% increase in radiographic infiltrates.                                                                               | 2 (3)                           | 1 (4)                              | 2 (3)                           |
| Occurrence of septic shock or multiple organ dysfunction syndrome                                                                                | 2 (3)                           | 0                                  | 4 (6)                           |
| No improvement of Pao2/Fio2 plus Persistence of fever or hypothermia with purulent respiratory secretions                                        | 10 (15)                         | 4 (16)                             | 7 (11)                          |
| No improvement of Pao2/Fio2 plus greater than or equal to 50% increase in radiographic infiltrates.                                              | 2 (3)                           | 7 (28)                             | 1 (2)                           |
| No improvement of Pao2/Fio2 plus occurrence of septic shock or multiple organ dysfunction syndrome                                               | 1 (2)                           | 0                                  | 2 (3)                           |
| Persistence of fever or hypothermia with purulent respiratory secretions plus greater than or equal to 50% increase in radiographic infiltrates. | 1 (2)                           | 1 (4)                              | 0                               |
| More than two causes                                                                                                                             | 2 (3)                           | 0                                  | 4 (6)                           |
| Death                                                                                                                                            | 1 (2)                           | 0                                  | 1 (2)                           |

**eTable 8. Univariate and multivariable Cox regression analyses for 28-day mortality (n = 136)**

| Variable                                                    | Univariate |              |                | Multivariable |              |                |
|-------------------------------------------------------------|------------|--------------|----------------|---------------|--------------|----------------|
|                                                             | HR         | 95% CI       | <i>p</i> value | HR            | 95% CI       | <i>p</i> value |
| Superinfection at day 3                                     | 1.92       | 0.97 to 3.79 | 0.061          | 2.39          | 1.16 to 4.92 | 0.018          |
| APACHE II score at ICU admission (+1 point)                 | 0.98       | 0.94 to 1.03 | 0.492          | 0.99          | 0.94 to 1.04 | 0.612          |
| Change in SOFA score from VAP diagnosis to day 3 (+1 point) | 1.17       | 1.01 to 1.35 | 0.041          | 1.15          | 0.97 to 1.37 | 0.110          |
| C-reactive protein at VAP diagnosis (+1 mg/L)               | 1.02       | 0.99 to 1.05 | 0.213          | 1.03          | 0.99 to 1.06 | 0.132          |
| Initial appropriate antibiotic therapy                      | 0.80       | 0.37 to 1.73 | 0.577          | 1.21          | 0.50 to 2.95 | 0.674          |

Abbreviations: APACHE II score = Acute Physiology And Chronic Health Evaluation II score; CI = confidence interval; HR = hazard ratio; SOFA = sequential organ failure assessment; VAP = ventilator-associated pneumonia.

**eTable 9. Internal validation of the multivariable Cox regression model for 28-day mortality using non-parametric bootstrap technique**

| <b>Variable</b>                                  | <b>Original</b> | <b>Bias</b> | <b>SE</b> | <b>95% BCa CI</b> | <b><i>p</i> value</b> |
|--------------------------------------------------|-----------------|-------------|-----------|-------------------|-----------------------|
| Superinfection at day 3                          | 0.871           | 0.016       | 0.389     | 0.046 to 1.674    | 0.011                 |
| APACHE II score at ICU admission                 | -0.013          | 0.000       | 0.022     | -0.060 to 0.030   | 0.530                 |
| Change in SOFA score from VAP diagnosis to day 3 | 0.141           | -0.007      | 0.084     | -0.015 to 0.291   | 0.079                 |
| C-reactive protein at VAP diagnosis (mg/L)       | 0.026           | -0.002      | 0.018     | -0.008 to 0.056   | 0.127                 |
| Initial appropriate antibiotic therapy           | 0.191           | 0.051       | 0.670     | -1.053 to 1.940   | 0.677                 |

Abbreviations: APACHE II score = Acute Physiology And Chronic Health Evaluation II score; BCa = adjusted bootstrap confidence interval; CI = confidence interval; ICU = intensive care unit; SE = standard error; SOFA = sequential organ failure assessment; VAP = ventilator-associated pneumonia.

**eTable 10 Comparisons of outcomes between patients with eradication and without eradication.**

|                                                   | Group 2                                                                              | Group 3                 |              |
|---------------------------------------------------|--------------------------------------------------------------------------------------|-------------------------|--------------|
| Variable                                          | Superinfection + Persistence +<br><i>Non-microbiologic assessed</i><br><br>(n = 185) | Eradication<br>(n = 65) | p value      |
| ERS/ESICM/ESCMID/ALAT guidelines adherence, n (%) | 89 (63)                                                                              | 40 (67)                 | 0.631        |
| Initial appropriate treatment, n (%)              | 119 (83)                                                                             | 54 (90)                 | 0.214        |
| Treatment failure on day 3, n (%)                 | 101 (55)                                                                             | 37 (57)                 | 0.745        |
| Days of MV, median (Q1; Q3)                       | 12 (8; 22)                                                                           | 18 (13; 27)             | <b>0.003</b> |
| Ventilator-free-days, median (Q1; Q3)             | 13 (8; 22)                                                                           | 7 (0; 20)               | 0.221        |
| ICU length of stay, median (Q1; Q3)               | 17 (12; 29)                                                                          | 24 (15; 35)             | <b>0.009</b> |
| ICU mortality, n (%)                              | 55 (30)                                                                              | 20 (31)                 | 0.875        |
| 28-days mortality, n (%)                          | 46 (25)                                                                              | 18 (28)                 | 0.653        |
| 90-days mortality, n (%)                          | 72 (40)                                                                              | 25 (40)                 | 0.916        |



**eFigure 1. ROC curve analysis of the multivariable regression model for superinfection**

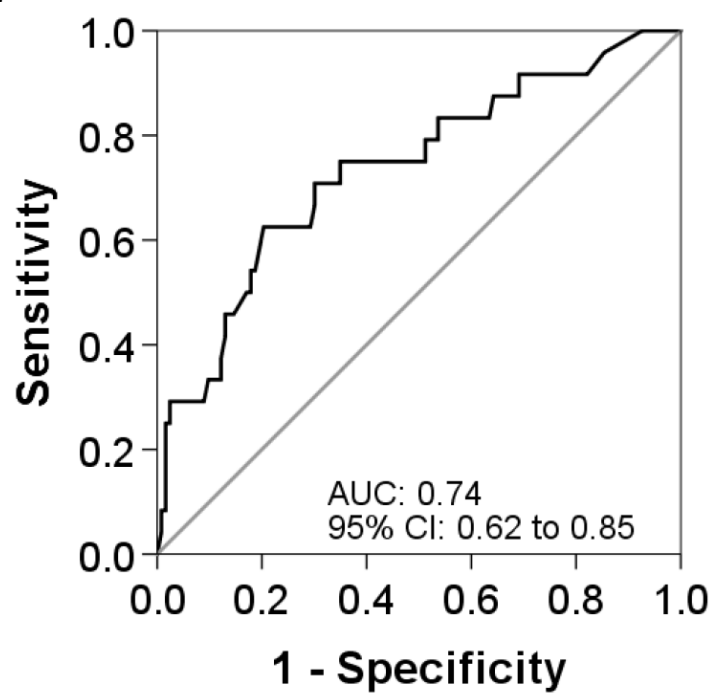

Abbreviations: AUC = area under the curve; CI = confidence interval; ROC = receiver operating characteristic.

eFigure 2 Kaplan Maier survival curve according to groups (superinfection vs others)

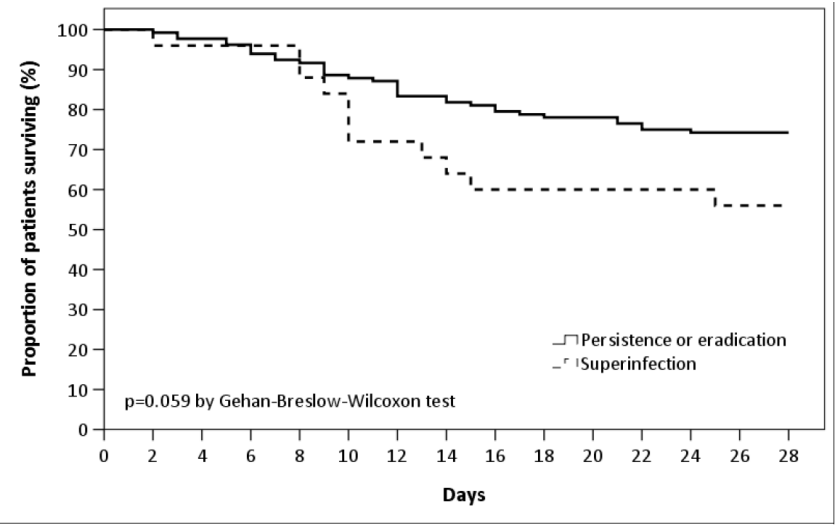

## References

1. Torres A, Niederman MS, Chastre J, Ewig S, Fernandez-Vandellos P, Hanberger H, Kollef M, Li Bassi G, Luna CM, Martin-Loeches I, Paiva JA, Read RC, Rigau D, Timsit JF, Welte T, Wunderink R. International ERS/ESICM/ESCMID/ALAT guidelines for the management of hospital-acquired pneumonia and ventilator-associated pneumonia: Guidelines for the management of hospital-acquired pneumonia (HAP)/ventilator-associated pneumonia (VAP) of the European Respiratory Society (ERS), European Society of Intensive Care Medicine (ESICM), European Society of Clinical Microbiology and Infectious Diseases (ESCMID) and Asociación Latinoamericana del Tórax (ALAT). *Eur. Respir. J.* 2017; 50.
2. Kalil AC, Metersky ML, Klompas M, Muscedere J, Sweeney DA, Palmer LB, Napolitano LM, O'Grady NP, Bartlett JG, Carratalà J, El Solh AA, Ewig S, Fey PD, File TM, Restrepo MI, Roberts JA, Waterer GW, Cruse P, Knight SL, Brozek JL. Management of Adults With Hospital-acquired and Ventilator-associated Pneumonia: 2016 Clinical Practice Guidelines by the Infectious Diseases Society of America and the American Thoracic Society. *Clin. Infect. Dis. Off. Publ. Infect. Dis. Soc. Am.* 2016; 63: e61–e111.
3. Larsson J, Itenov TS, Bestle MH. Risk prediction models for mortality in patients with ventilator-associated pneumonia: A systematic review and meta-analysis. *J. Crit. Care* 2017; 37: 112–118.
4. Luna CM, Blanzaco D, Niederman MS, Matarucco W, Baredes NC, Desmery P, Palizas F, Menga G, Rios F, Apezteguia C. Resolution of ventilator-associated pneumonia: prospective evaluation of the clinical pulmonary infection score as an early clinical predictor of outcome. *Crit. Care Med.* 2003; 31: 676–682.
5. Cole TJ. Applied logistic regression. D. W. Hosmer and S. Lemeshow, Wiley, New York, 1989. No. of pages: xiii + 307. Price: £36.00. *Stat. Med.* 1991; 10: 1162–1163.
6. D. Collett. Modelling Binary Data, Second Edition. 1991.
7. Collet D. Modelling Survival Data in Medical Research. 2nd edition. London; 1994.
8. Efron B, Tibshirani RJ. An Introduction to the Bootstrap. CRC Press; 1994.
